# Supplementary material
Source: PubMed Central journal article supplement (PMC7254833)
Supplement: nn9b08752_si_001.pdf [file nn9b08752_si_001.pdf]

## Supporting Information

### Reversible Control of Protein Corona Formation on Gold Nanoparticles Using Host-Guest Interactions

Jesús Mosquera<sup>†±\*</sup>, Isabel García<sup>†</sup>, Malou Henriksen-Lacey<sup>†</sup>, Miguel Martínez-Calvo<sup>#</sup>, Mónica Dhanjani<sup>†</sup>, José L. Mascareñas<sup>#</sup>, Luis M. Liz-Marzán<sup>†‡\*</sup>

<sup>†</sup>CIC biomaGUNE and CIBER-BBN, Basque Research and Technology Alliance (BRTA), Paseo de Miramón 182, 20014 Donostia-San Sebastián, Spain.

<sup>±</sup>Present address: Department of Chemical Engineering and Chemistry, Eindhoven University of Technology, The Netherlands

<sup>#</sup>Departamento de Química Orgánica and Centro Singular de Investigación en Química Biolóxica e Materiais Moleculares (CIQUS). Universidade de Santiago de Compostela. 15782 Santiago de Compostela, Spain

<sup>‡</sup>Ikerbasque, Basque Foundation for Science, 48013 Bilbao, Spain

\*e-mail: [j.mosquera@tue.nl](mailto:j.mosquera@tue.nl); [lizmarzan@cicbiomagune.es](mailto:lizmarzan@cicbiomagune.es)

## Contents

|                                                                                       |    |
|---------------------------------------------------------------------------------------|----|
| General Experimental Procedures .....                                                 | 3  |
| Synthesis of organic molecules .....                                                  | 4  |
| 1. Synthesis of <b>Pyr-CO<sub>2</sub>H</b> .....                                      | 4  |
| 2. Synthesis of <b>A</b> .....                                                        | 4  |
| <b>NS2</b> characterization.....                                                      | 5  |
| DLS evaluation of the protein corona size on <b>NS2</b> .....                         | 6  |
| Protein corona on <b>NS2</b> and <b>NS-PEG</b> by SDS-PAGE .....                      | 7  |
| <b>NS-PEG</b> characterization.....                                                   | 8  |
| Protein corona on a <b>NS2</b> analogue with a short organic ligand .....             | 9  |
| Fluorescence evaluation of the interaction between <b>NS2</b> and cage <b>A</b> ..... | 10 |
| Protein corona on <b>NS2</b> in 100% rat serum.....                                   | 12 |
| Protein corona on <b>NS2</b> in the presence of spermine.....                         | 12 |
| Mass spectrometry analysis.....                                                       | 13 |
| Protein corona on <b>NS1</b> .....                                                    | 20 |
| Cell viability .....                                                                  | 20 |
| TEM images of <b>NS2</b> internalization in the absence of cage <b>A</b> .....        | 21 |
| <b>NR3</b> characterization .....                                                     | 21 |
| Protein corona on <b>NR3</b> .....                                                    | 22 |
| References .....                                                                      | 22 |

## General Experimental Procedures

Cetyltrimethylammonium bromide (CTAB, 99%), hydrogen tetrachloroaurate trihydrate ( $\text{HAuCl}_4 \cdot 3\text{H}_2\text{O}$ ,  $\geq 99.9\%$ ), L-ascorbic acid ( $\geq 99\%$ ), sodium borohydride ( $\text{NaBH}_4$ , 99%), silver nitrate ( $\text{AgNO}_3$ ,  $\geq 99.0\%$ ), O-[2-(3-mercaptopropionylamino)ethyl]-O'-methylpolyethylene glycol 5 KDa (PEG-SH) and the rest of organic molecules were purchased from Sigma-Aldrich and were used without further purification. Alpha-Amino-omega-mercapto poly(ethylene glycol) hydrochloride 5 KDa (HS-PEG-NH<sub>2</sub>) was purchased from Iris Biotech. UV-Vis spectra were measured with an Agilent 8453 UV-Vis diode-array spectrophotometer. Transmission electron microscopy (TEM) images were obtained using a JEOL JEM-2100F electron microscope, at an acceleration voltage of 200 kV. Samples for TEM analysis were prepared by adding a single drop (2  $\mu\text{L}$ ) of the aqueous dispersion (*ca.* 0.1 mg/mL in milli-Q water) of gold nanoparticles onto a copper grid coated with a carbon film (Electron Microscopy Sciences) placed on parafilm. The grid was dried in air for several hours at room temperature. Zeta potential measurements were performed in a Malvern Zetasizer 3000 HS particle size analyzer (Malvern Instruments, UK). Fluorescence measurements were made with a PerkinElmer LS55 Fluorescence Spectrometer. Milli-Q water (resistivity 18.2 M $\Omega$ ·cm at 25 °C) was used in all experiments. ICP-MS measurements were performed on a Thermo iCAP Q ICP-MS (Thermo Fisher Scientific GmbH, Bremen, Germany). An ASX-560 autosampler was coupled to the ICP-MS (CETAC Tech, Omaha, NE, USA).

The Image J software with the algorithm “Measure\_ROI.class” was employed to measure the dimensions of gold nanoparticles from TEM images. About 100–300 nanoparticles per sample were measured.

HeLa and J774 cells were grown in DMEM supplemented with 10% FBS and 1% PBS (both Invitrogen). Cells were routinely checked for mycoplasma using MycoAlert Assay (Lonza).

## Synthesis of organic molecules

### 1. Synthesis of Pyr-CO<sub>2</sub>H

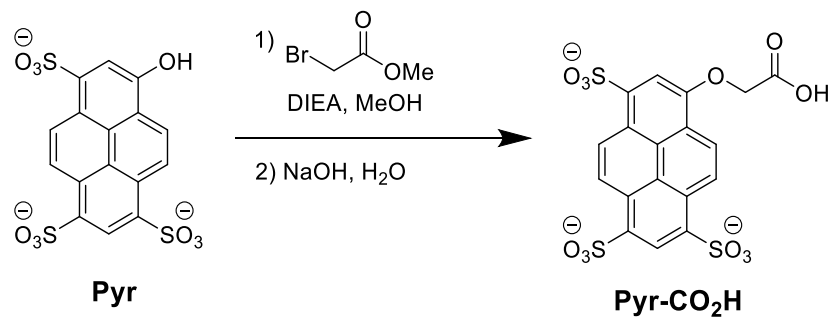

Pyr-CO<sub>2</sub>H was synthesized as previously described in the literature.<sup>1</sup>

### 2. Synthesis of A

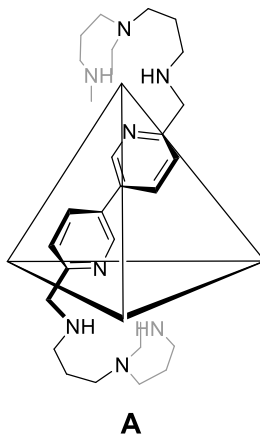

Cage **A** was synthesized according to the procedure reported in the literature.<sup>2</sup>

## NS2 characterization

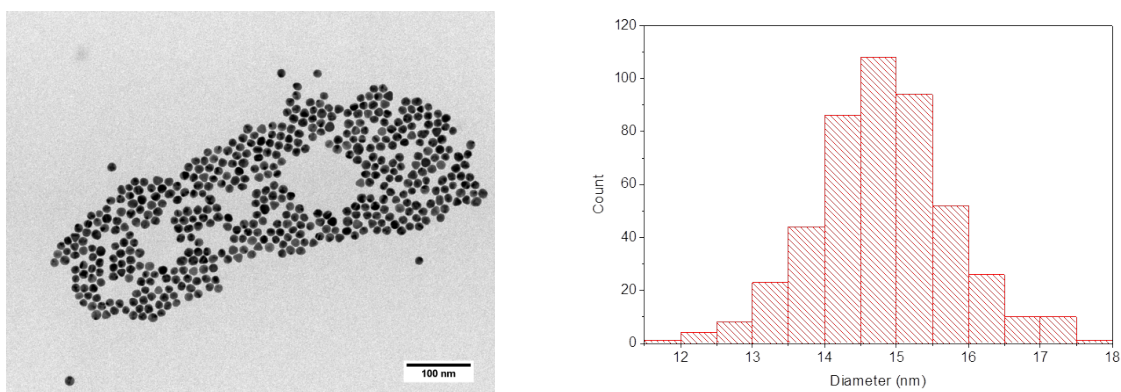

**Figure S1.** (Left) Representative transmission electron microscopy (TEM) image of NS2. (Right) Histogram size distribution from TEM images, the average diameter is  $14.8 \pm 0.9$  nm.

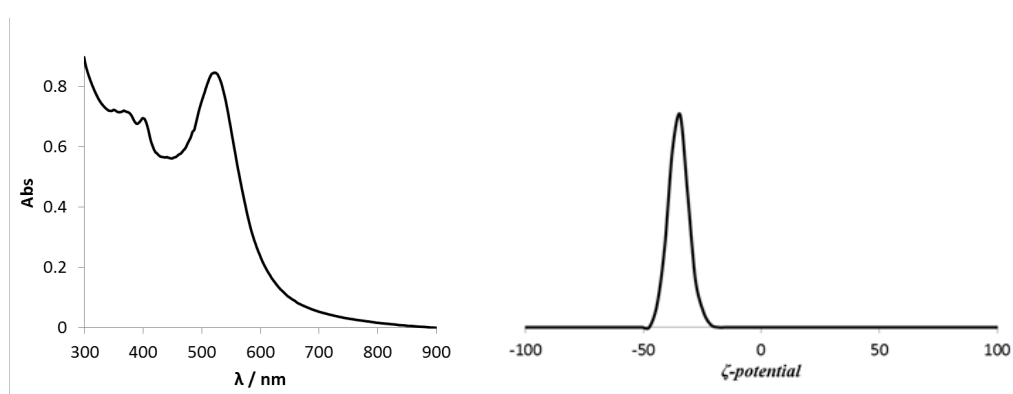

**Figure S2.** (Left) UV-visible-NIR spectra of NS2. (Right) Zeta potential distribution for NS2 ( $-37 \pm 2$  mV). Both measurements were performed in Milli-Q water at room temperature.

## DLS evaluation of the protein corona size on NS2

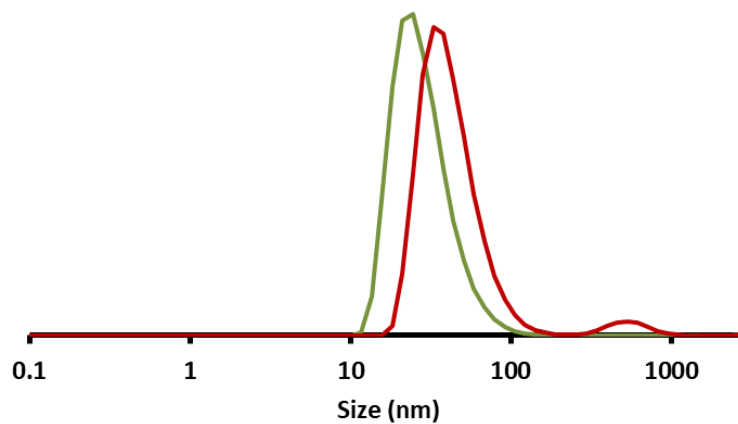

**Figure S3.** The effect of PC formation on the DLS size distribution (by volume) of NS2. Size distribution before (green line) and after (red lines) interaction with 5% of FBS. The average hydrodynamic diameter (three replicates) in the absence of FBS is  $26 \pm 2$  nm and in the presence of FBS is  $43 \pm 1$  nm.

## Protein corona on NS2 and NS-PEG by SDS-PAGE

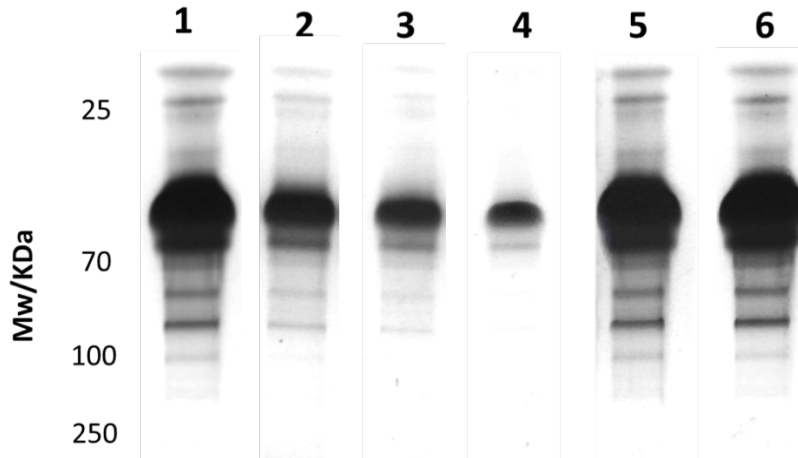

**Figure S4:** Comparison of the amount of FBS immobilized on **NS2** and **NS-PEG** particles, upon addition of cage **A**. Lane 1: 200  $\mu$ L of **NS2** ( $7.5 \times 10^{11}$  particles/mL) diluted in FBS (5% in PBS) after 30 min of incubation. Lane 2: Same conditions as in Lane 1, but using 5  $\mu$ M of cage **A** during incubation with FBS. Lane 3: Same conditions as in Lane 1, but using 10  $\mu$ M of cage **A** during incubation with FBS. Lane 4: Same conditions as in Lane 1, but using 20  $\mu$ M of cage **A** during incubation with FBS. Lane 5: 200  $\mu$ L of **NS-PEG** ( $7.5 \times 10^{11}$  particles/mL) diluted in FBS (5% in PBS) after 30 min of incubation. Lane 6: Same conditions as in Lane 5 in the presence of 10  $\mu$ M of cage **A**. The amount of protein was quantified using ImageJ (for the entire lane) and normalized against the result for lane 1: lane 1 (100%); lane 2 (42%); lane 3 (31%); lane 4 (18%); lane 5 (109%); lane 6 (117%).

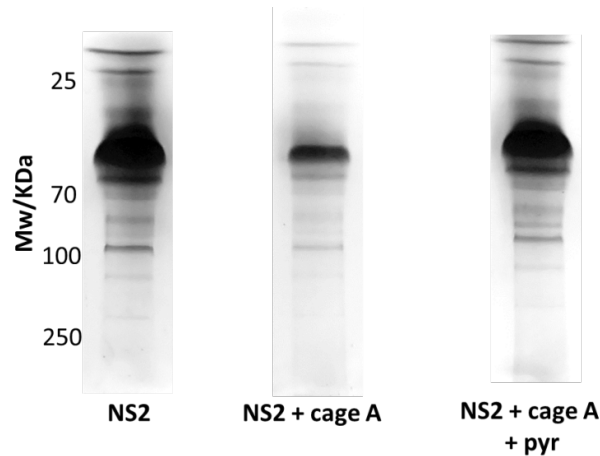

**Figure S5.** Comparison of the amount and type of FBS proteins immobilized onto **NS2** particles, upon addition of cage **A** and **pyr**. SDS-PAGE gels run for 40 min and stained with Coomassie Blue. Lane 1: **NS2** (200 $\mu$ L,  $7.5 \times 10^{11}$  particles/mL) diluted in FBS (5% in PBS) after 30 min of incubation. Lane 2: Same conditions as in lane 1, followed by addition of 20  $\mu$ M of cage **A** and 10 min of incubation. Lane 3: Same conditions as in lane 2, followed by addition of 50  $\mu$ M of free **pyr** and 10 min of incubation. The amount of protein was quantified using ImageJ and normalized against the result for lane 1: lane 1 (100%); lane 2 (21%); lane 3 (81%).

## NS-PEG characterization

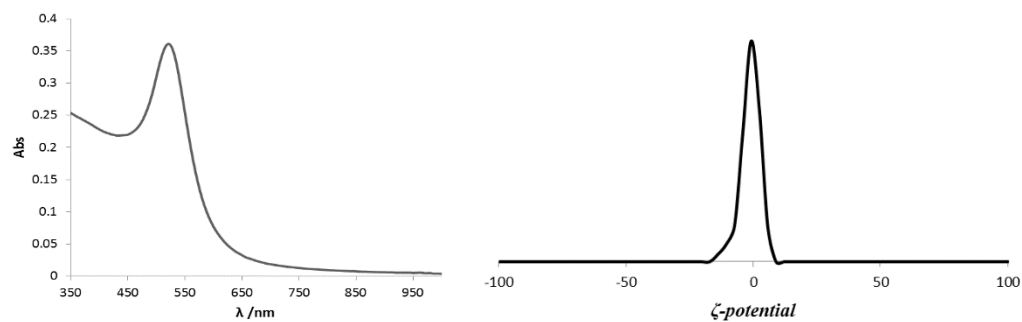

**Figure S6.** (Left) UV-visible-NIR spectra of **NS-PEG**. (Right) Zeta potential distribution for **NS-PEG** ( $-3.1 \pm 0.4$  mV). Both measurements were performed in Milli-Q water at room temperature.



## Protein corona on a NS2 analogue with a short organic ligand

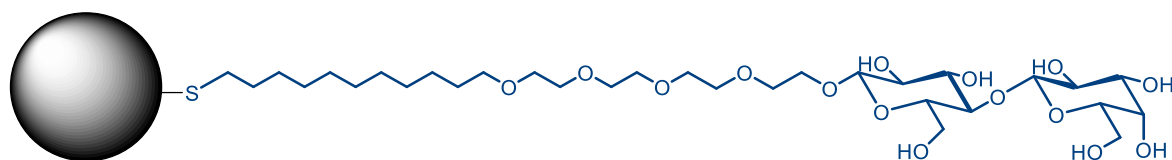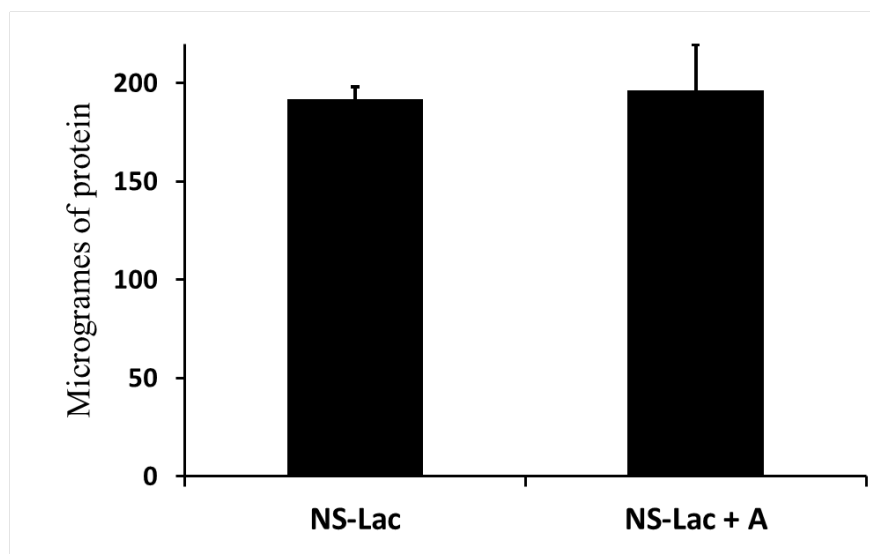

**Figure S7.** Comparison of the amount of FBS immobilized on **NS-Lac** particles in the presence and absence of cage **A**. (Top) Chemical structure of the ligand bound to the surface for **NS-Lac**. The metallic core of this particle is the same as **NS1**. The organic ligand was synthesized following a reported protocol.<sup>3</sup> (Bottom) Comparison of the amount of FBS protein immobilized on **NS-Lac** particles. **NS-Lac**: only **NS-Lac** (200 $\mu$ L,  $7.5 \times 10^{11}$  particles/mL) diluted in 5% of FBS. **NS-Lac + A**: same conditions as the previous case, followed by addition of 20  $\mu$ M of cage **A** and 10 min of incubation.

## Fluorescence evaluation of the interaction between NS2 and cage A

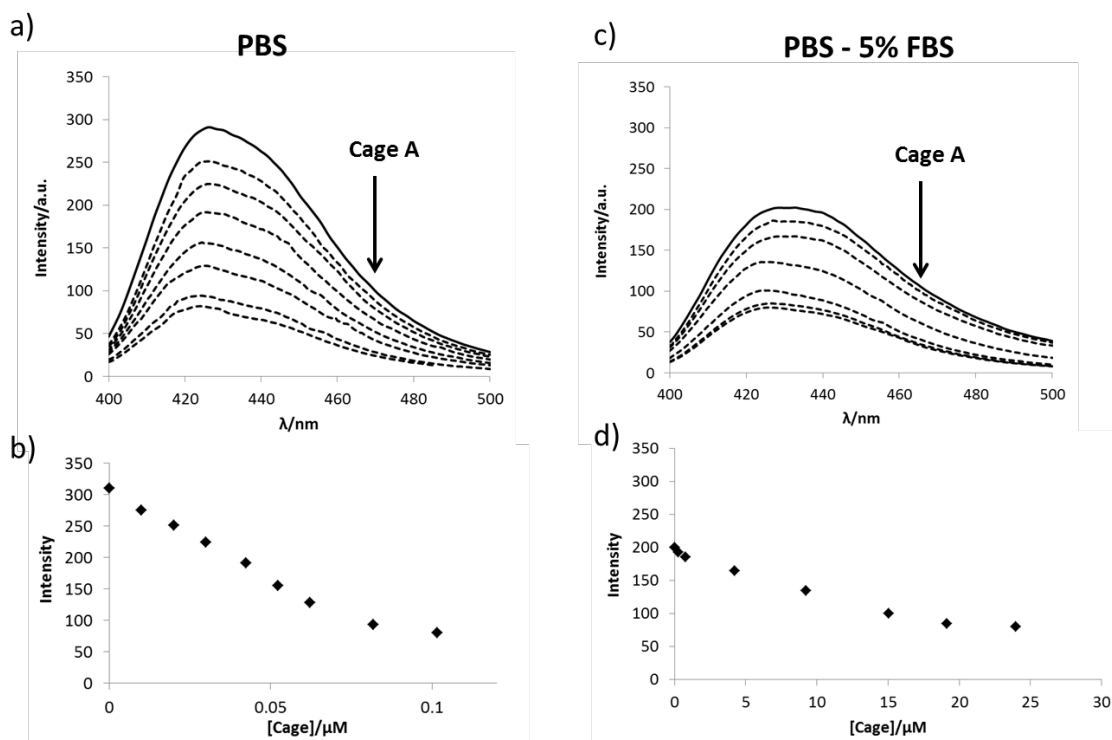

**Figure S8.** (a) Solid line: fluorescence emission spectrum from a suspension of NS2 ( $1.25 \times 10^{11}$  NP/mL) in PBS. Dashed lines: fluorescence emission spectra from NS2 after addition of increasing amounts of cage A. (b) Variation of pyranine fluorescence as a function of concentration of A, monitored at 425 nm. (c) Solid line: fluorescence emission spectrum from NS2 ( $1.25 \times 10^{11}$  NP/mL) in PBS with 5% FBS. Dashed lines: fluorescence emission spectra of NS2 after addition of increasing amounts of cage A. (d) Variation of the pyranine fluorescence as a function of concentration of A, monitored at 425 nm.

## Bicinchoninic acid (BCA) quantification

The Bicinchoninic acid (BCA) assay was performed to quantify the amount of protein recovered in the washing steps and the amount of protein remaining on the particle. A calibration curve of 5 points was first generated by serial dilutions of BSA in Milli-Q water, from 1500 to 0  $\mu\text{g/mL}$ . BCA reagents A and B were mixed at a ratio 50 : 1 and 200  $\mu\text{L}$  of the BCA mixture was dispensed into 96 well-plates. Then, 10  $\mu\text{L}$  of each standard or each sample of adsorbed proteins was added to each well. The plate was incubated for 1 hour at 37  $^{\circ}\text{C}$  and then the absorbance at 574 nm was recorded on a plate reader (Fluostar Omega).

Proteins adsorbed onto AuNPs were detached from Au NPs upon treatment with sodium dodecyl sulfate (SDS) (10%) and dithiothreitol (DTT; 0.5 mM), at 90  $^{\circ}\text{C}$  for 10 min, purified by dialysis (Micro DispoDialyzer, 10K MWCO) and quantified by a BCA Protein assay kit.

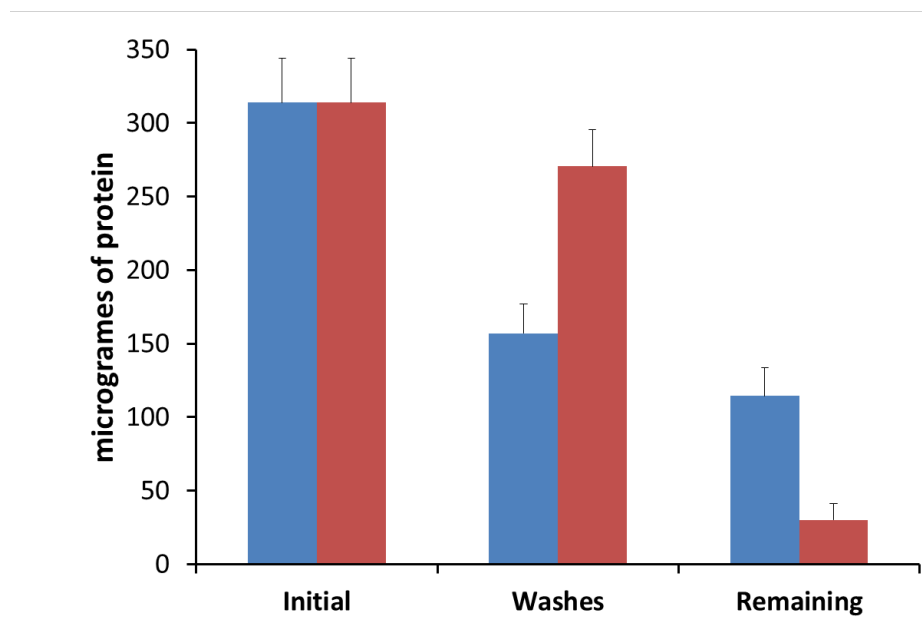

**Figure S9.** Bicinchoninic acid (BCA) quantification of the protein content in the absence (blue) and in the presence of cage A (20  $\mu\text{M}$ , red) when NS2 ( $1.5 \times 10^{11}$  particles) was incubated with dilute FBS (5% in PBS) for 30 min at 25  $^{\circ}\text{C}$ . *Initial* represents the amount of protein incubated with the NPs. *Washes* represents the amount of protein recovered in the washing steps. *Remaining* represents the amount of protein still bound to the NPs after the washing steps.

### Protein corona on NS2 in 100% rat serum

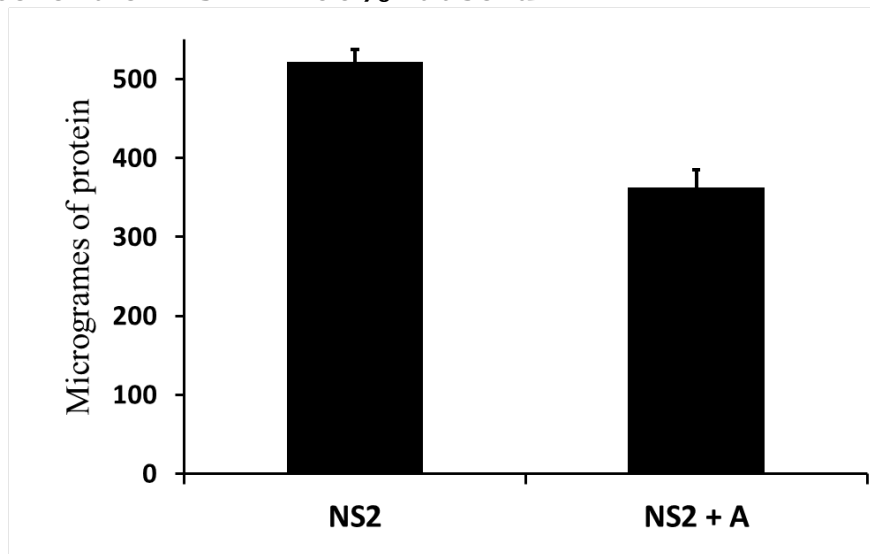

**Figure S10.** Comparison of the amount of rat serum protein immobilized on NS2 particles. NS2: only NS2 (200 $\mu$ L,  $7.5 \times 10^{11}$  particles/mL) diluted in 100% rat serum. NS2 + A: same conditions as the previous case, followed by addition of 100  $\mu$ M of cage A and 10 min of incubation. Sprague Dawley Rat serum was recovered from whole blood donations from normal healthy rats.

### Protein corona on NS2 in the presence of spermine

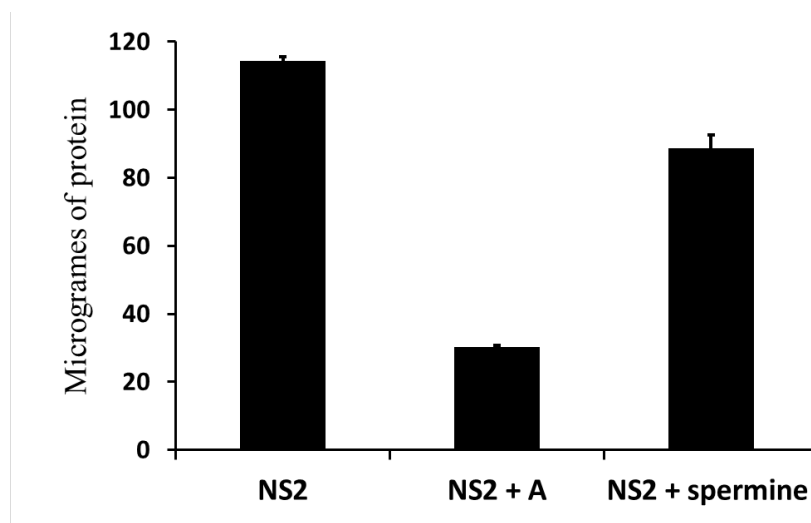

**Figure S11.** Comparison of the amount of FBS proteins immobilized onto NS2 particles, upon addition of cage A or spermine by BCA analysis. NS2: only NS2 (200 $\mu$ L,  $7.5 \times 10^{11}$  particles/mL) diluted in FBS (5% in PBS). NS2 + A: same conditions as the previous case, followed by addition of 20  $\mu$ M of cage A and 10 min of incubation. NS2+ spermine: same conditions as NS2, followed by addition of 20  $\mu$ M of spermine and 10 min of incubation.

## Mass spectrometry analysis

Samples were analyzed in a hybrid trapped ion mobility spectrometry – quadrupole time of flight mass spectrometer (timsTOF Pro with PASEF, Bruker Daltonics) coupled online to a nanoElute liquid chromatograph (Bruker). This mass spectrometer takes advantage of a scan mode termed parallel accumulation – serial fragmentation (PASEF), which multiplies the sequencing speed with no sensitivity loss (<https://www.ncbi.nlm.nih.gov/pubmed/26538118>) and has been shown to provide outstanding analytical speed and sensibility for proteomics analyses (<https://www.ncbi.nlm.nih.gov/pubmed/30385480>). The sample (200 ng) was directly loaded in a 15 cm Bruker nanelute FIFTEEN C18 analytical column (Bruker) and resolved at 400 nL/min with a 30 min gradient. The column was heated to 50 °C using an oven. PEAKS software (Bioinformatics Solutions) was used for protein identification and differential analysis. Only proteins identified with a FDR<5% and two different peptides were considered as reliable hits. Regarding the differential analysis, proteins with a PEAKSQ significance higher than 20 (corresponding to a  $p < 0.01$ ) and a ratio higher than 2 in either direction were considered as differentially present between samples. Significantly differential proteins ( $p < 0.01$ ) were analyzed using DAVID (<https://david.ncifcrf.gov/>) in order to characterize the biological processes they are involved in.

**Table S1.** List of proteins comprising the PC on NS2, for which the relative abundance increases or decreases more than two times during the cage/pyranine cycle of the SDS-PAGE assay showed in Figure 3 (main manuscript) based on LC-MS/MS analysis.

| Identified protein                           | Ratio       | Step 1 | Step 3 | Step 5 | Step 2 | Step 4 | Step 6 |
|----------------------------------------------|-------------|--------|--------|--------|--------|--------|--------|
| Beta-enolase                                 | <b>0.15</b> | 0.86   | 0.84   | 1.30   | 0.00   | 0.18   | 0.00   |
| Plasminogen                                  | <b>0.21</b> | 0.90   | 0.74   | 1.37   | 0.16   | 0.28   | 0.20   |
| Pantetheinase                                | <b>0.24</b> | 1.09   | 0.91   | 1.00   | 0.29   | 0.19   | 0.25   |
| Tetranectin                                  | <b>0.25</b> | 0.78   | 1.12   | 1.10   | 0.20   | 0.25   | 0.29   |
| Plasma kallikrein                            | <b>0.29</b> | 0.81   | 1.03   | 1.15   | 0.36   | 0.24   | 0.29   |
| Carboxypeptidase B2                          | <b>0.30</b> | 0.97   | 0.94   | 1.09   | 0.40   | 0.21   | 0.32   |
| Inter-alpha-trypsin inhibitor heavy chain H4 | <b>0.30</b> | 1.18   | 0.75   | 1.06   | 0.31   | 0.32   | 0.26   |
| Prothrombin                                  | <b>0.31</b> | 0.95   | 0.90   | 1.15   | 0.34   | 0.32   | 0.28   |
| Complement component C6                      | <b>0.32</b> | 1.14   | 1.00   | 0.86   | 0.35   | 0.37   | 0.24   |
| Alpha-1B-glycoprotein                        | <b>0.33</b> | 1.05   | 0.84   | 1.11   | 0.48   | 0.29   | 0.26   |
| Plasma serine protease inhibitor             | <b>0.35</b> | 0.96   | 1.03   | 1.01   | 0.39   | 0.35   | 0.31   |
| Complement factor H                          | <b>0.35</b> | 0.85   | 0.96   | 1.19   | 0.44   | 0.36   | 0.27   |
| C4b-binding protein alpha chain              | <b>0.36</b> | 0.79   | 1.08   | 1.13   | 0.34   | 0.36   | 0.35   |
| Thrombospondin-1                             | <b>0.36</b> | 0.92   | 0.91   | 1.17   | 0.35   | 0.39   | 0.33   |
| Gelsolin                                     | <b>0.37</b> | 0.95   | 0.92   | 1.13   | 0.31   | 0.48   | 0.33   |
| Keratin type I cytoskeletal 26               | <b>0.37</b> | 0.91   | 1.22   | 0.87   | 0.49   | 0.33   | 0.31   |
| Kininogen-1                                  | <b>0.40</b> | 1.08   | 0.98   | 0.94   | 0.51   | 0.31   | 0.39   |
| Inter-alpha-trypsin inhibitor heavy chain H3 | <b>0.40</b> | 1.13   | 0.82   | 1.05   | 0.53   | 0.33   | 0.36   |
| Antithrombin-III                             | <b>0.41</b> | 1.05   | 0.91   | 1.04   | 0.49   | 0.36   | 0.38   |
| Factor XIIa inhibitor                        | <b>0.41</b> | 0.92   | 0.93   | 1.16   | 0.44   | 0.38   | 0.40   |
| Protein AMBP                                 | <b>0.43</b> | 1.11   | 0.76   | 1.13   | 0.46   | 0.43   | 0.39   |
| Complement component C9                      | <b>0.47</b> | 0.90   | 1.13   | 0.97   | 0.45   | 0.49   | 0.46   |
| Pigment epithelium-derived factor            | <b>0.47</b> | 0.81   | 1.07   | 1.12   | 0.50   | 0.47   | 0.43   |
| Beta-2-glycoprotein 1                        | <b>0.48</b> | 1.20   | 0.82   | 0.98   | 0.58   | 0.40   | 0.46   |
| Alpha-fetoprotein                            | <b>0.49</b> | 1.00   | 0.87   | 1.13   | 0.61   | 0.43   | 0.46   |
| Tudor domain-containing protein 7            | <b>2.52</b> | 0.76   | 1.08   | 1.16   | 2.50   | 2.39   | 2.54   |

**Table S2.** Proteins immobilized onto NS2 during the cage A/pyr cycle.

| Identified protein | p value  | Step 1  | Step 3  | Step 5  | Step 2  | Step 4  | Step 6  |
|--------------------|----------|---------|---------|---------|---------|---------|---------|
| ALBU_BOVIN         | 0.253285 | 3889896 | 3739982 | 4360010 | 3840067 | 3320111 | 3240084 |
| TRFE_BOVIN         | 0.004223 | 1319994 | 1330005 | 1740053 | 1019973 | 820020  | 928988  |
| A2MG_BOVIN         | 0.006907 | 975985  | 688979  | 906973  | 506991  | 311010  | 303009  |
| FETUA_BOVIN        | 0.336998 | 795003  | 768987  | 830028  | 767018  | 614009  | 676017  |
| A1AT_BOVIN         | 0.441825 | 753005  | 797984  | 824980  | 795995  | 599999  | 622019  |
| CO3_BOVIN          | 0.066283 | 573010  | 682988  | 619996  | 439012  | 496007  | 415014  |
| APOA1_BOVIN        | 0.359742 | 340006  | 369010  | 371010  | 359991  | 379989  | 366995  |
| FETA_BOVIN         | 0.001377 | 336000  | 294009  | 380992  | 205005  | 143999  | 154003  |
| K1C10_BOVIN        | 1.05E-05 | 264004  | 267004  | 287002  | 413005  | 432998  | 428014  |
| VTDB_BOVIN         | 0.486142 | 228004  | 183002  | 235000  | 170996  | 87999   | 127003  |
| ANT3_BOVIN         | 0.001502 | 198999  | 172998  | 197994  | 93703   | 68400   | 71800   |
| HBA_BOVIN          | 0.272589 | 194998  | 276995  | 219993  | 194998  | 219004  | 211002  |
| ITIH4_BOVIN        | 0.000848 | 172998  | 109997  | 154999  | 45801   | 47400   | 37401   |
| HBBF_BOVIN         | 0.025327 | 143999  | 147996  | 154003  | 167001  | 207997  | 214007  |
| K2C5_BOVIN         | 0.234632 | 136998  | 120996  | 143004  | 165997  | 239008  | 161000  |
| FETUB_BOVIN        | 0.785751 | 136998  | 154003  | 145999  | 119000  | 84602   | 104998  |
| APOE_BOVIN         | 0.581172 | 130004  | 233005  | 165997  | 170003  | 175998  | 153003  |
| CFAB_BOVIN         | 0.131515 | 120996  | 120996  | 99997   | 76200   | 70498   | 67402   |
| PLMN_BOVIN         | 0.000914 | 116003  | 95598   | 177001  | 20300   | 36800   | 26101   |
| ITIH3_BOVIN        | 0.018219 | 103998  | 75700   | 96397   | 48601   | 30201   | 32800   |
| A2AP_BOVIN         | 0.007803 | 84602   | 66198   | 77898   | 51999   | 34699   | 43301   |
| A1BG_BOVIN         | 0.003611 | 81200   | 64401   | 85599   | 37099   | 22000   | 20400   |
| CFAH_BOVIN         | 0.022193 | 78201   | 87500   | 109002  | 40401   | 32600   | 24801   |
| HEMO_BOVIN         | 0.174013 | 74803   | 57801   | 66299   | 58102   | 37401   | 43301   |
| TPM3_BOVIN         | 0.080031 | 69701   | 89998   | 92901   | 96899   | 99100   | 134002  |
| SPA37_BOVIN        | 0.106058 | 69499   | 51999   | 63899   | 36401   | 22000   | 31799   |
| A1AG_BOVIN         | 0.097652 | 67201   | 68799   | 77898   | 58701   | 40100   | 51401   |
| AMBP_BOVIN         | 0.000804 | 62100   | 42799   | 63002   | 25500   | 23999   | 21700   |
| CO4_BOVIN          | 0.088221 | 55500   | 60700   | 75099   | 35900   | 31700   | 29200   |
| PEDF_BOVIN         | 0.154082 | 54501   | 72099   | 75198   | 33701   | 31799   | 29099   |
| CO7_BOVIN          | 0.017837 | 50500   | 65101   | 68699   | 41701   | 49999   | 42201   |
| GELS_BOVIN         | 0.000607 | 45501   | 43899   | 53799   | 15000   | 22999   | 15800   |
| FINC_BOVIN         | 0.947686 | 39801   | 34699   | 34800   | 35001   | 27999   | 29701   |
| AFAM_BOVIN         | 0.003828 | 39101   | 32299   | 32400   | 24600   | 18900   | 16700   |
| THRB_BOVIN         | 3.97E-05 | 33200   | 31700   | 40401   | 12000   | 11100   | 9760    |
| TTHY_BOVIN         | 0.75199  | 32501   | 37200   | 44899   | 31901   | 27800   | 37900   |
| K1C17_BOVIN        | 0.92662  | 31301   | 24901   | 30400   | 29600   | 88697   | 31599   |
| APOH_BOVIN         | 0.496791 | 30101   | 20499   | 24400   | 14600   | 10100   | 11500   |

|             |          |       |       |       |       |       |       |
|-------------|----------|-------|-------|-------|-------|-------|-------|
| ADIPO_BOVIN | 0.479786 | 29099 | 26599 | 25100 | 18900 | 11900 | 17200 |
| CCD25_BOVIN | 0.203046 | 28501 | 38100 | 32400 | 43400 | 50200 | 40900 |
| VNN1_BOVIN  | 0.000102 | 27900 | 23400 | 25800 | 7520  | 4950  | 6320  |
| PSD11_BOVIN | 0.894666 | 27600 | 32800 | 32600 | 25800 | 8630  | 20200 |
| KNG1_BOVIN  | 0.017206 | 26401 | 23800 | 22999 | 12500 | 7650  | 9500  |
| ITIH1_BOVIN | 0.003371 | 25700 | 17700 | 26500 | 11500 | 6000  | 7770  |
| TETN_BOVIN  | 0.008667 | 21700 | 31301 | 30900 | 5670  | 6940  | 8060  |
| IPSP_BOVIN  | 5.7E-05  | 21599 | 23299 | 22799 | 8750  | 7830  | 6950  |
| FA5_BOVIN   | 0.071865 | 20900 | 27800 | 27800 | 12800 | 14000 | 13000 |
| K1C19_BOVIN | 0.569878 | 20601 | 3510  | 4440  | 4680  | 7560  | 3500  |
| F12AI_BOVIN | 0.001379 | 19700 | 19900 | 24801 | 9430  | 8110  | 8610  |
| KLKB1_BOVIN | 0.003558 | 19500 | 24801 | 27700 | 8670  | 5720  | 6880  |
| CO9_BOVIN   | 0.018064 | 18500 | 23100 | 19900 | 9190  | 9950  | 9400  |
| CASA1_BOVIN | 0.518525 | 17900 | 17200 | 18701 | 19700 | 19200 | 17600 |
| DBNL_BOVIN  | 0.096234 | 16999 | 21200 | 28501 | 29399 | 26000 | 29300 |
| FA10_BOVIN  | 0.320193 | 15100 | 9650  | 15800 | 6460  | 5260  | 3660  |
| G3P_BOVIN   | 0.088338 | 14900 | 14800 | 12600 | 9580  | 11800 | 11100 |
| THBG_BOVIN  | 0.721845 | 14300 | 7900  | 10300 | 5840  | 2880  | 4450  |
| SYWC_BOVIN  | 0.329755 | 13900 | 10400 | 11000 | 12700 | 14400 | 12300 |
| APOA2_BOVIN | 0.047567 | 13700 | 13900 | 18400 | 16800 | 21301 | 22499 |
| ASPM_BOVIN  | 0.003159 | 13600 | 18701 | 13700 | 27400 | 28100 | 26401 |
| RET4_BOVIN  | 0.782166 | 13300 | 11700 | 14900 | 8030  | 4840  | 8010  |
| TSP1_BOVIN  | 0.000292 | 12600 | 12400 | 16000 | 4770  | 5300  | 4490  |
| APOA4_BOVIN | 0.827052 | 12600 | 12900 | 9170  | 10900 | 8990  | 8330  |
| EF1A1_BOVIN | 0.304077 | 12100 | 20800 | 15300 | 11200 | 19800 | 9630  |
| K2C79_BOVIN | 0.870414 | 12100 | 17500 | 20499 | 19400 | 24400 | 17600 |
| PROS_BOVIN  | 0.013418 | 11900 | 8620  | 7140  | 4550  | 4420  | 3320  |
| C4BPA_BOVIN | 0.015976 | 11700 | 16100 | 16800 | 5080  | 5390  | 5190  |
| BIP_BOVIN   | 0.04955  | 11200 | 16000 | 10600 | 11200 | 6660  | 6890  |
| CO6_BOVIN   | 0.042938 | 11000 | 9630  | 8330  | 3410  | 3600  | 2310  |
| CLUS_BOVIN  | 0.972088 | 11000 | 11300 | 9960  | 8520  | 8440  | 7000  |
| CO1A1_BOVIN | 0.445343 | 10800 | 14600 | 13500 | 13900 | 18701 | 13200 |
| ANXA2_BOVIN | 0.272467 | 10400 | 7680  | 4090  | 9760  | 25399 | 10700 |
| MPRI_BOVIN  | 0.017105 | 9280  | 7960  | 15200 | 4830  | 5270  | 6370  |
| KNG2_BOVIN  | 0.009189 | 8380  | 8870  | 10800 | 5160  | 1780  | 1690  |
| FIBA_BOVIN  | 0.021695 | 8240  | 8190  | 7650  | 7110  | 5040  | 6040  |
| HS71A_BOVIN | 0.130627 | 7870  | 4330  | 6070  | 4800  | 4960  | 3810  |
| HS71B_BOVIN | 0.130627 | 7870  | 4330  | 6070  | 4800  | 4960  | 3810  |
| PACN1_BOVIN | 0.193331 | 7630  | 6860  | 10100 | 11100 | 45099 | 10300 |
| AOC3_BOVIN  | 0.288954 | 7270  | 4360  | 6430  | 3530  | 2700  | 2080  |
| AOCY_BOVIN  | 0.288954 | 7270  | 4360  | 6430  | 3530  | 2700  | 2080  |



|             |          |      |       |       |       |       |       |
|-------------|----------|------|-------|-------|-------|-------|-------|
| PLAK_BOVIN  | 0.898926 | 7270 | 6600  | 6410  | 8160  | 10400 | 8930  |
| ENOA_BOVIN  | 0.17626  | 7120 | 4970  | 6120  | 4370  | 4710  | 3580  |
| TRFL_BOVIN  | 0.072367 | 7070 | 6390  | 33601 | 2630  | 3300  | 2010  |
| CAND1_BOVIN | 0.543758 | 6850 | 5970  | 10500 | 5500  | 5880  | 5860  |
| SYCP3_BOVIN | 0.83711  | 6680 | 5350  | 5790  | 4830  | 6220  | 3380  |
| PI4KB_BOVIN | 0.158597 | 6470 | 5510  | 8280  | 8880  | 9250  | 8130  |
| PDIA1_BOVIN | 0.113679 | 6440 | 6510  | 6920  | 4270  | 5180  | 6690  |
| KC1G1_BOVIN | 0.815685 | 6170 | 11000 | 10300 | 8950  | 5820  | 7030  |
| UBP16_BOVIN | 0.089803 | 5710 | 5000  | 6570  | 3180  | 3030  | 2440  |
| H4_BOVIN    | 0.669273 | 5500 | 2210  | 3690  | 3700  | 6950  | 2850  |
| RL40_BOVIN  | 0.007274 | 5380 | 5650  | 4640  | 7530  | 11900 | 8260  |
| UBC_BOVIN   | 0.007274 | 5380 | 5650  | 4640  | 7530  | 11900 | 8260  |
| RS27A_BOVIN | 0.007274 | 5380 | 5650  | 4640  | 7530  | 11900 | 8260  |
| UBB_BOVIN   | 0.007274 | 5380 | 5650  | 4640  | 7530  | 11900 | 8260  |
| HS90A_BOVIN | 0.152754 | 5330 | 3410  | 4560  | 3050  | 3790  | 2120  |
| K2C71_BOVIN | 0.55175  | 5000 | 5410  | 1640  | 4290  | 3770  | 3750  |
| LUM_BOVIN   | 0.596661 | 4980 | 5620  | 4500  | 6470  | 6270  | 8260  |
| DSG1_BOVIN  | 0.328925 | 4820 | 2670  | 3000  | 3940  | 2700  | 2230  |
| FIBB_BOVIN  | 0.875387 | 4670 | 6750  | 5240  | 4310  | 3990  | 4010  |
| CAP1_BOVIN  | 0.011109 | 4440 | 5460  | 6400  | 3550  | 2100  | 2680  |
| MYH10_BOVIN | 0.097618 | 4430 | 3940  | 6610  | 3440  | 3880  | 2400  |
| PGK1_BOVIN  | 0.951098 | 4180 | 4230  | 3400  | 2700  | 4450  | 3190  |
| ACTS_BOVIN  | 0.84594  | 4090 | 6200  | 3520  | 4600  | 6030  | 3220  |
| ACTC_BOVIN  | 0.84594  | 4090 | 6200  | 3520  | 4600  | 6030  | 3220  |
| STK38_BOVIN | 0.248798 | 4040 | 3890  | 4760  | 4230  | 5330  | 5230  |
| TDRD7_BOVIN | 0.001367 | 4030 | 5730  | 6180  | 13300 | 12700 | 13500 |
| APOD_BOVIN  | 0.393819 | 4000 | 6000  | 5260  | 4550  | 6050  | 5350  |
| H2A2C_BOVIN | 0.156429 | 3820 | 1240  | 727   | 1240  | 749   | 437   |
| ARGI1_BOVIN | 0.303055 | 3720 | 2320  | 2490  | 3140  | 3220  | 2890  |
| K2C73_BOVIN | 0.2134   | 3520 | 2310  | 3090  | 3840  | 3980  | 2870  |
| HPT_BOVIN   | 0.078562 | 3500 | 4640  | 2450  | 2430  | 1880  | 2430  |
| FA11_BOVIN  | 0.759451 | 3480 | 3850  | 2870  | 3370  | 2820  | 2900  |
| SPA38_BOVIN | 0.830371 | 3460 | 2360  | 1280  | 1040  | 1330  | 1410  |
| HRG_BOVIN   | 0.011525 | 3330 | 2200  | 2490  | 1580  | 535   | 611   |
| ACTB_BOVIN  | 0.162988 | 3260 | 2620  | 2650  | 2050  | 2730  | 1570  |
| CE290_BOVIN | 0.377515 | 3150 | 4150  | 5120  | 4620  | 4560  | 4040  |
| CBPB2_BOVIN | 0.003565 | 3060 | 2970  | 3440  | 1260  | 665   | 1020  |
| PKP3_BOVIN  | 0.108398 | 3030 | 2070  | 1730  | 3640  | 2520  | 5390  |
| 1433Z_BOVIN | 0.236352 | 3000 | 4860  | 5590  | 2260  | 5470  | 2290  |
| F13A_BOVIN  | 0.018737 | 2830 | 2770  | 2130  | 1340  | 301   | 176   |
| HS90B_BOVIN | 0.961561 | 2750 | 378   | 1350  | 1230  | 2570  | 1110  |

|             |          |      |      |      |       |      |      |
|-------------|----------|------|------|------|-------|------|------|
| SAHH_BOVIN  | 0.240367 | 2730 | 4920 | 2580 | 3810  | 4330 | 3770 |
| K2C75_BOVIN | 0.039436 | 2700 | 2530 | 1840 | 3820  | 5880 | 3100 |
| RET3_BOVIN  | 0.582315 | 2670 | 2110 | 1580 | 2190  | 1380 | 1860 |
| PGRP1_BOVIN | 0.651339 | 2670 | 6940 | 6040 | 2780  | 3950 | 3350 |
| K1C20_BOVIN | 0.246624 | 2480 | 1060 | 2300 | 2320  | 2560 | 2080 |
| KPCA_BOVIN  | 0.664558 | 2470 | 912  | 2910 | 3270  | 3160 | 3910 |
| K2C78_BOVIN | 0.120657 | 2450 | 2570 | 3720 | 3710  | 3130 | 3910 |
| SPA36_BOVIN | 0.728977 | 2360 | 1500 | 866  | 1140  | 244  | 1200 |
| CASK_BOVIN  | 0.191161 | 2350 | 4190 | 3640 | 4700  | 5520 | 5520 |
| VIME_BOVIN  | 0.450416 | 2300 | 3310 | 1850 | 2710  | 3510 | 831  |
| PKP1_BOVIN  | 0.081407 | 2270 | 1960 | 2390 | 1190  | 1820 | 1580 |
| TPIS_BOVIN  | 0.444407 | 2270 | 804  | 797  | 1610  | 1860 | 257  |
| IBP2_BOVIN  | 0.429107 | 1850 | 1280 | 2190 | 144   | 907  | 963  |
| K1C26_BOVIN | 0.00156  | 1830 | 2460 | 1740 | 977   | 669  | 617  |
| PHLD_BOVIN  | 0.090895 | 1810 | 1120 | 1280 | 152   | 570  | 218  |
| KRT83_BOVIN | 0.858105 | 1800 | 884  | 875  | 1010  | 867  | 936  |
| COMP_BOVIN  | 0.106818 | 1750 | 1680 | 843  | 909   | 716  | 1120 |
| K2C4_BOVIN  | 0.709511 | 1730 | 354  | 710  | 787   | 5540 | 912  |
| ERO1A_BOVIN | 0.745358 | 1720 | 799  | 2610 | 739   | 1950 | 634  |
| DSC1_BOVIN  | 0.443629 | 1710 | 277  | 602  | 1390  | 705  | 605  |
| TBB5_BOVIN  | 0.962849 | 1610 | 590  | 142  | 1490  | 2010 | 599  |
| CSTF2_BOVIN | 0.235607 | 1580 | 3600 | 3420 | 4340  | 3070 | 3630 |
| K1C14_BOVIN | 0.657092 | 1580 | 1470 | 1540 | 2220  | 4530 | 2320 |
| ATPB_BOVIN  | 0.706788 | 1580 | 6050 | 1500 | 2620  | 1910 | 1390 |
| KRT35_BOVIN | 0.186557 | 1450 | 676  | 302  | 750   | 269  | 201  |
| CHIA_BOVIN  | 0.588631 | 1430 | 2170 | 2430 | 1240  | 248  | 1230 |
| K2C72_BOVIN | 0.714161 | 1390 | 1940 | 1540 | 713   | 4980 | 2030 |
| HABP2_BOVIN | 0.56873  | 1350 | 2030 | 1350 | 2230  | 916  | 1670 |
| ROA2_BOVIN  | 0.749706 | 1320 | 919  | 1120 | 992   | 1510 | 874  |
| CO2A1_BOVIN | 0.564622 | 1250 | 3910 | 2240 | 2500  | 1550 | 2580 |
| EF2_BOVIN   | 0.215331 | 1240 | 1880 | 1670 | 1170  | 1740 | 1060 |
| RGN_BOVIN   | 0.306067 | 1170 | 1270 | 837  | 19500 | 723  | 799  |
| TGO1_BOVIN  | 0.108674 | 1150 | 1450 | 1770 | 2430  | 4700 | 2150 |
| NFX1_BOVIN  | 0.208631 | 1090 | 1030 | 818  | 907   | 2100 | 2020 |
| RS3A_BOVIN  | 0.026851 | 1060 | 1370 | 1370 | 899   | 408  | 367  |
| GLNA_BOVIN  | 0.871401 | 1060 | 464  | 211  | 715   | 321  | 451  |
| ENOB_BOVIN  | 0.003469 | 1030 | 1000 | 1550 | 262   | 218  | 91   |
| ATPA_BOVIN  | 0.382422 | 1020 | 899  | 599  | 213   | 2260 | 392  |
| CBG_BOVIN   | 0.610117 | 966  | 849  | 1180 | 1080  | 667  | 222  |
| TSP4_BOVIN  | 0.192279 | 939  | 1530 | 1880 | 360   | 595  | 551  |
| FA9_BOVIN   | 0.819305 | 929  | 1040 | 520  | 872   | 339  | 790  |

|             |          |     |      |      |      |      |      |
|-------------|----------|-----|------|------|------|------|------|
| C1S_BOVIN   | 0.064577 | 895 | 923  | 1160 | 470  | 176  | 621  |
| SPA31_BOVIN | 0.392677 | 891 | 439  | 414  | 95   | 461  | 456  |
| KPCB_BOVIN  | 0.315309 | 886 | 1020 | 999  | 780  | 257  | 79   |
| LACB_BOVIN  | 0.823682 | 850 | 304  | 991  | 1750 | 740  | 532  |
| ACTG_BOVIN  | 0.342581 | 827 | 182  | 621  | 515  | 865  | 471  |
| K1C25_BOVIN | 0.976582 | 823 | 4010 | 809  | 100  | 4490 | 3620 |
| RUSD3_BOVIN | 0.33511  | 809 | 1330 | 2100 | 531  | 1050 | 1130 |
| MCM5_BOVIN  | 0.219528 | 785 | 1600 | 1120 | 655  | 511  | 979  |
| ARF1_BOVIN  | 0.098994 | 770 | 1000 | 1420 | 1410 | 1280 | 1710 |
| ARF3_BOVIN  | 0.098994 | 770 | 1000 | 1420 | 1410 | 1280 | 1710 |
| ARF2_BOVIN  | 0.098994 | 770 | 1000 | 1420 | 1410 | 1280 | 1710 |
| HSP7C_BOVIN | 0.88357  | 753 | 841  | 215  | 376  | 1980 | 1030 |
| PSB2_BOVIN  | 0.497658 | 730 | 305  | 935  | 1040 | 774  | 996  |
| ACTN4_BOVIN | 0.56297  | 730 | 1510 | 1500 | 1990 | 3070 | 2150 |
| K2C8_BOVIN  | 0.569633 | 691 | 765  | 649  | 641  | 517  | 610  |
| TERA_BOVIN  | 0.063508 | 668 | 920  | 1130 | 787  | 200  | 257  |
| CATA_BOVIN  | 0.045268 | 649 | 734  | 712  | 637  | 389  | 323  |
| CADH5_BOVIN | 0.27584  | 621 | 1000 | 366  | 648  | 514  | 276  |
| HGFL_BOVIN  | 0.168701 | 615 | 255  | 1430 | 550  | 293  | 142  |
| KASH5_BOVIN | 0.060853 | 603 | 564  | 630  | 875  | 1050 | 610  |
| 1433E_BOVIN | 0.397559 | 603 | 956  | 732  | 668  | 1120 | 401  |
| CLIC1_BOVIN | 0.599268 | 582 | 240  | 124  | 376  | 814  | 460  |
| TCPB_BOVIN  | 0.673209 | 576 | 1300 | 591  | 1530 | 1390 | 1310 |
| 1433S_BOVIN | 0.60358  | 575 | 495  | 254  | 516  | 2610 | 374  |
| K1C27_BOVIN | 0.731166 | 564 | 121  | 414  | 325  | 588  | 382  |
| OLFL3_BOVIN | 0.872259 | 562 | 882  | 785  | 845  | 692  | 708  |
| CO1A2_BOVIN | 0.40795  | 539 | 2470 | 1830 | 1690 | 376  | 1140 |
| CLH1_BOVIN  | 0.29566  | 504 | 145  | 183  | 349  | 181  | 56   |
| PGAM1_BOVIN | 0.552067 | 495 | 1380 | 737  | 782  | 864  | 364  |
| TCPZ_BOVIN  | 0.107568 | 369 | 332  | 946  | 1320 | 841  | 739  |
| TBB4B_BOVIN | 0.454661 | 337 | 1610 | 355  | 896  | 1130 | 886  |
| MOES_BOVIN  | 0.414187 | 335 | 601  | 3290 | 1840 | 957  | 1270 |
| PABP1_BOVIN | 0.507582 | 301 | 369  | 1120 | 382  | 4460 | 1910 |
| K2C74_BOVIN | 0.169045 | 229 | 1200 | 266  | 3150 | 7630 | 1570 |
| CAZA2_BOVIN | 0.997682 | 118 | 1030 | 426  | 681  | 909  | 402  |
| HBB_BOVIN   | 0.509141 | 75  | 1350 | 640  | 391  | 219  | 3520 |
| CTNB1_BOVIN | 0.865931 | 55  | 498  | 122  | 731  | 102  | 239  |

## Protein corona on NS1

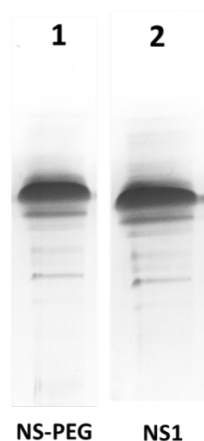

**Figure S12.** Comparison of the amount of FBS immobilized on **NS1** and **NS-PEG** particles. Lane 1: 200  $\mu\text{L}$  of **NS-PEG** ( $7.5 \times 10^{11}$  particles/mL) diluted in FBS (5% in PBS) after 30 min of incubation. Lane 2: 200  $\mu\text{L}$  of **NS1** ( $7.5 \times 10^{11}$  particles/mL) diluted in FBS (5% in PBS) after 30 min of incubation. The amount of protein was quantified using ImageJ and normalized against the result for lane 1: lane 1 (100%); lane 2 (168%).

## Cell viability

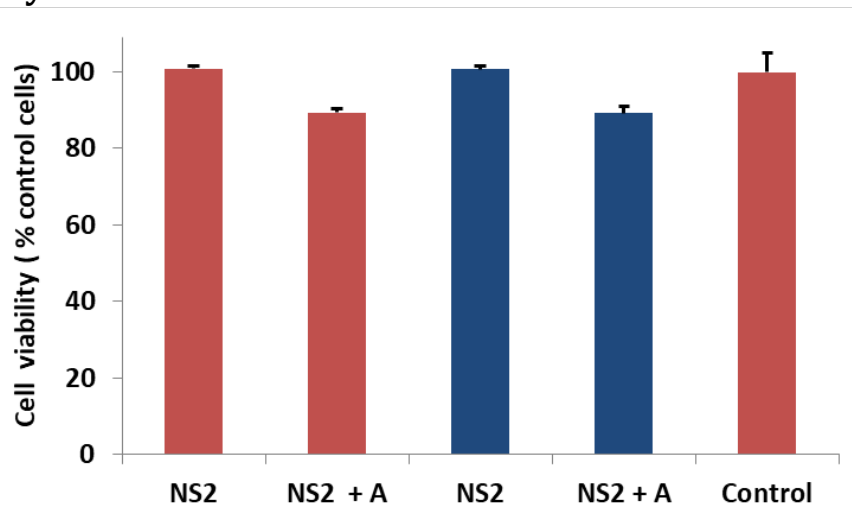

**Figure S13.** MTT assay (Lonza) of HeLa cells treated with **NS2** ( $9 \times 10^{10}$  particles/mL for red bars;  $3 \times 10^{10}$  particles/mL for blue bars), in the presence and absence of cage **A** ( $5 \mu\text{M}$ ). HeLa cells were plated in 96-well plates and allowed to adhere overnight. The following day cell media was replaced with NPs, with and without cage **A**, diluted in DMEM containing 10% FBS. Cells were incubated at  $37^\circ\text{C}$  for 24h. MTT reagent was added to the cells for 1h, followed by washing and addition of DMSO. Cell absorbance at 550 nm was measured and the mean cell viability is presented as a percentage of control cells,  $\pm$  SD.  $N=3$ .

## TEM images of NS2 internalization in the absence of cage A

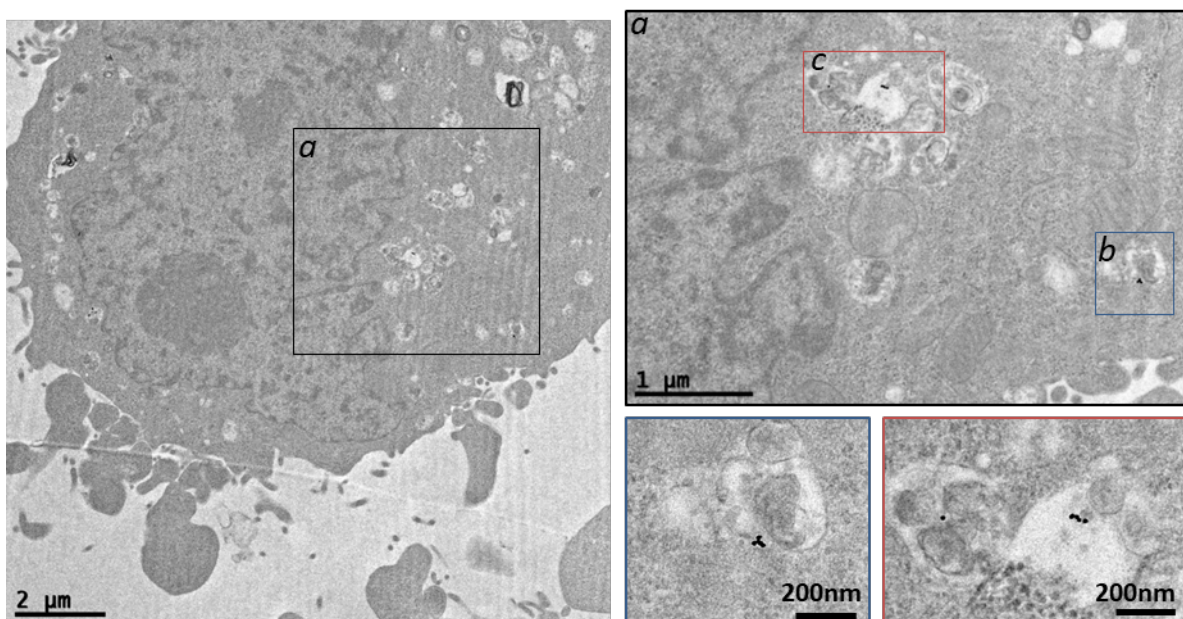

**Figure S14.** TEM images of one HeLa cell incubated with NS2 ( $9 \times 10^{10}$  NP/mL) in DMEM with 10% FBS, for 24 h, at a concentration of  $9 \times 10^{10}$  NP/mL in the absence of cage A.

## NR3 characterization

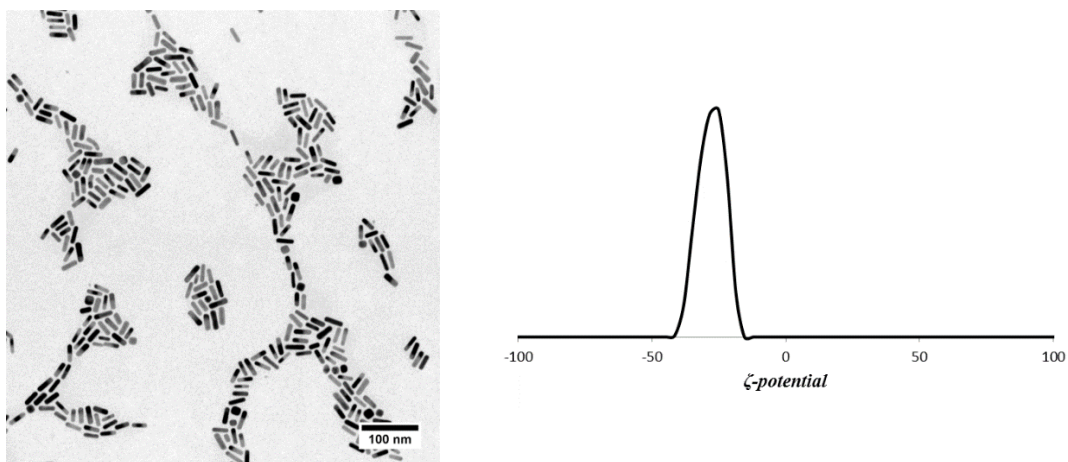

**Figure S15.** (Left) Representative TEM image of NR3. Based on TEM images the average dimensions are  $29 \pm 4$  nm  $\times$   $9 \pm 1$  nm. (Right) Zeta potential distribution for NR3 ( $-27 \pm 2$  mV). Both measurements were performed in Milli-Q water at room temperature.

## Protein corona on NR3

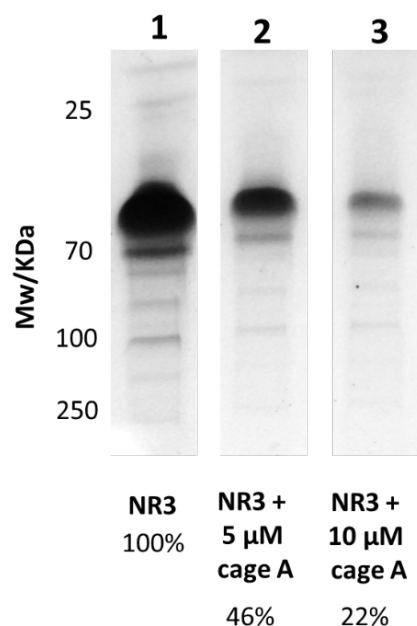

**Figure S16.** Comparison of the amount of FBS immobilized on **NR3**, upon addition of cage **A**. Lane 1: **NR3** ( $7.5 \times 10^{11}$  particles/mL, 200  $\mu$ L) diluted in FBS (5% in PBS) after 30 min of incubation. Lane 2: Same conditions as in Lane 1, but using 5  $\mu$ M of cage **A** during incubation with FBS. Lane 3: Same conditions as in Lane 1, but using 10  $\mu$ M of cage **A** during incubation with FBS. The amount of protein was quantified using ImageJ and normalized against the result for lane 1: lane 1 (100%); lane 2 (46%); lane 3 (22%).

## References

- (1) Nyren-Erickson, E. K.; Haldar, M. K.; Gu, Y.; Qian, S. Y.; Friesner, D. L.; Mallik, S. Fluorescent Liposomes for Differential Interactions with Glycosaminoglycans. *Anal. Chem.* **2011**, *83*, 5989–5995.
- (2) Mosquera, J.; Zarra, S.; Nitschke, J. R. Aqueous Anion Receptors through Reduction of Subcomponent Self-Assembled Structures. *Angew. Chem. Int. Ed.* **2014**, *53*, 1556–1559.
- (3) García, I.; Sánchez-Iglesias, A.; Henriksen-Lacey, M.; Grzelczak, M.; Penadés, S.; Liz-Marzán, L. M. Glycans as Biofunctional Ligands for Gold Nanorods: Stability and Targeting in Protein-Rich Media. *J. Am. Chem. Soc.* **2015**, *137*, 3686–3692.
